# Supplementary material
Source: PubMed Central journal article supplement (PMC4788218)
Supplement: seda890186.ww2_default.pdf [file seda890186.ww2_default.pdf]

**Appendix 2: Details of registries [posted as supplied by author]**

| Registry<br>Criteria                       | Kaiser                                                                                                                                                                                                                                                                | England & Wales                                                                                                                                                                                                                         | Australia                                                                                                                                                            | Italy (Emilia-Romagna)                                                                                                                                                                                                     | New Zealand                                                                                                                                                                                                                | CMS data                                                                                                          |
|--------------------------------------------|-----------------------------------------------------------------------------------------------------------------------------------------------------------------------------------------------------------------------------------------------------------------------|-----------------------------------------------------------------------------------------------------------------------------------------------------------------------------------------------------------------------------------------|----------------------------------------------------------------------------------------------------------------------------------------------------------------------|----------------------------------------------------------------------------------------------------------------------------------------------------------------------------------------------------------------------------|----------------------------------------------------------------------------------------------------------------------------------------------------------------------------------------------------------------------------|-------------------------------------------------------------------------------------------------------------------|
| Registry Elements                          | <ul style="list-style-type: none"> <li>- Demographics</li> <li>- Co-morbidities</li> <li>- Diagnosis</li> <li>- Implant characteristics</li> <li>- Fixation</li> <li>- Procedures</li> <li>- Surgical approach</li> <li>- Hospital admission and discharge</li> </ul> | Minimum Dataset and additional elements such as BMI <ul style="list-style-type: none"> <li>- Demographics</li> <li>- Diagnosis</li> <li>- Prosthesis Details</li> <li>- ICD codes after linkage with administrative database</li> </ul> | Minimum Dataset <ul style="list-style-type: none"> <li>- Demographics</li> <li>- Diagnosis</li> <li>- Prosthesis Details</li> <li>- ICD 10 Procedure Code</li> </ul> | Minimum Dataset and additional elements such as BMI and prior surgery <ul style="list-style-type: none"> <li>- Demographics</li> <li>- Diagnosis</li> <li>- Prosthesis Details</li> <li>- ICD 10 Procedure Code</li> </ul> | Minimum Dataset and additional elements such as BMI and prior surgery <ul style="list-style-type: none"> <li>- Demographics</li> <li>- Diagnosis</li> <li>- Prosthesis Details</li> <li>- ICD 10 Procedure Code</li> </ul> | -Demographics<br>-ICD-9 code based diagnosis and procedure<br>No prosthesis details but codes for bearing surface |
| Long-term Outcomes                         | Revision Death<br>Re-admissions                                                                                                                                                                                                                                       | Revision Death<br>Functional outcomes                                                                                                                                                                                                   | Revision Death                                                                                                                                                       | Revision Death                                                                                                                                                                                                             | Revision Death<br>Functional outcomes                                                                                                                                                                                      | Revision Death                                                                                                    |
| Completeness:<br>% coverage<br>% follow up | >95% coverage across participating KP regions<br>7.5%-8.3% left KP health plan alive and 3.4%-4.3% deceased                                                                                                                                                           | 82% average from 2003 to 2010, 98% in 2009<br>Follow-up will be 100% after linkages                                                                                                                                                     | 100% National data capture<br>No loss to follow -up                                                                                                                  | 97% National data capture in 2009<br>Minimal loss to follow -up related to migration                                                                                                                                       | 100% National data capture<br>No loss to follow -up                                                                                                                                                                        | 100% coverage<br>100% follow -up (patient over 65)                                                                |
| Funding/data contribution:                 | Funded by KP/voluntary contribution                                                                                                                                                                                                                                   | Implant levy, British orthopedic Society/voluntary data                                                                                                                                                                                 | Funded entirely by the Commonwealth Government of Australia/mandatory contribution                                                                                   | Unknown/voluntary contribution                                                                                                                                                                                             | New Zealand Ministry of Health, orthopedic surgeons, Southern Cross Hospitals                                                                                                                                              | CMS/mandatory but high chance of coding errors                                                                    |
| % Implants included/ time frame            | 92% from 2001                                                                                                                                                                                                                                                         | Exact % is unknown but most implants                                                                                                                                                                                                    | 100% from full national data collection in mid 2002                                                                                                                  | 90%+ from full national data collection since 2001                                                                                                                                                                         | 100% from full national data collection since 1999                                                                                                                                                                         | No implants-only bearing surface data/2004-2008                                                                   |
| Risk adjusted estimates in annual reports  | Risk adjusted<br>Published paper                                                                                                                                                                                                                                      | Risk adjusted estimates in annual report                                                                                                                                                                                                | Limited risk adjustment                                                                                                                                              | Risk adjusted estimates in annual report                                                                                                                                                                                   | Limited risk adjustment                                                                                                                                                                                                    | Risk adjusted<br>Published paper                                                                                  |
