# Supplementary material
Source: PubMed Central journal article supplement (PMC4788218)

**Appendix 3: Identification of studies for inclusion [posted as supplied by author]**

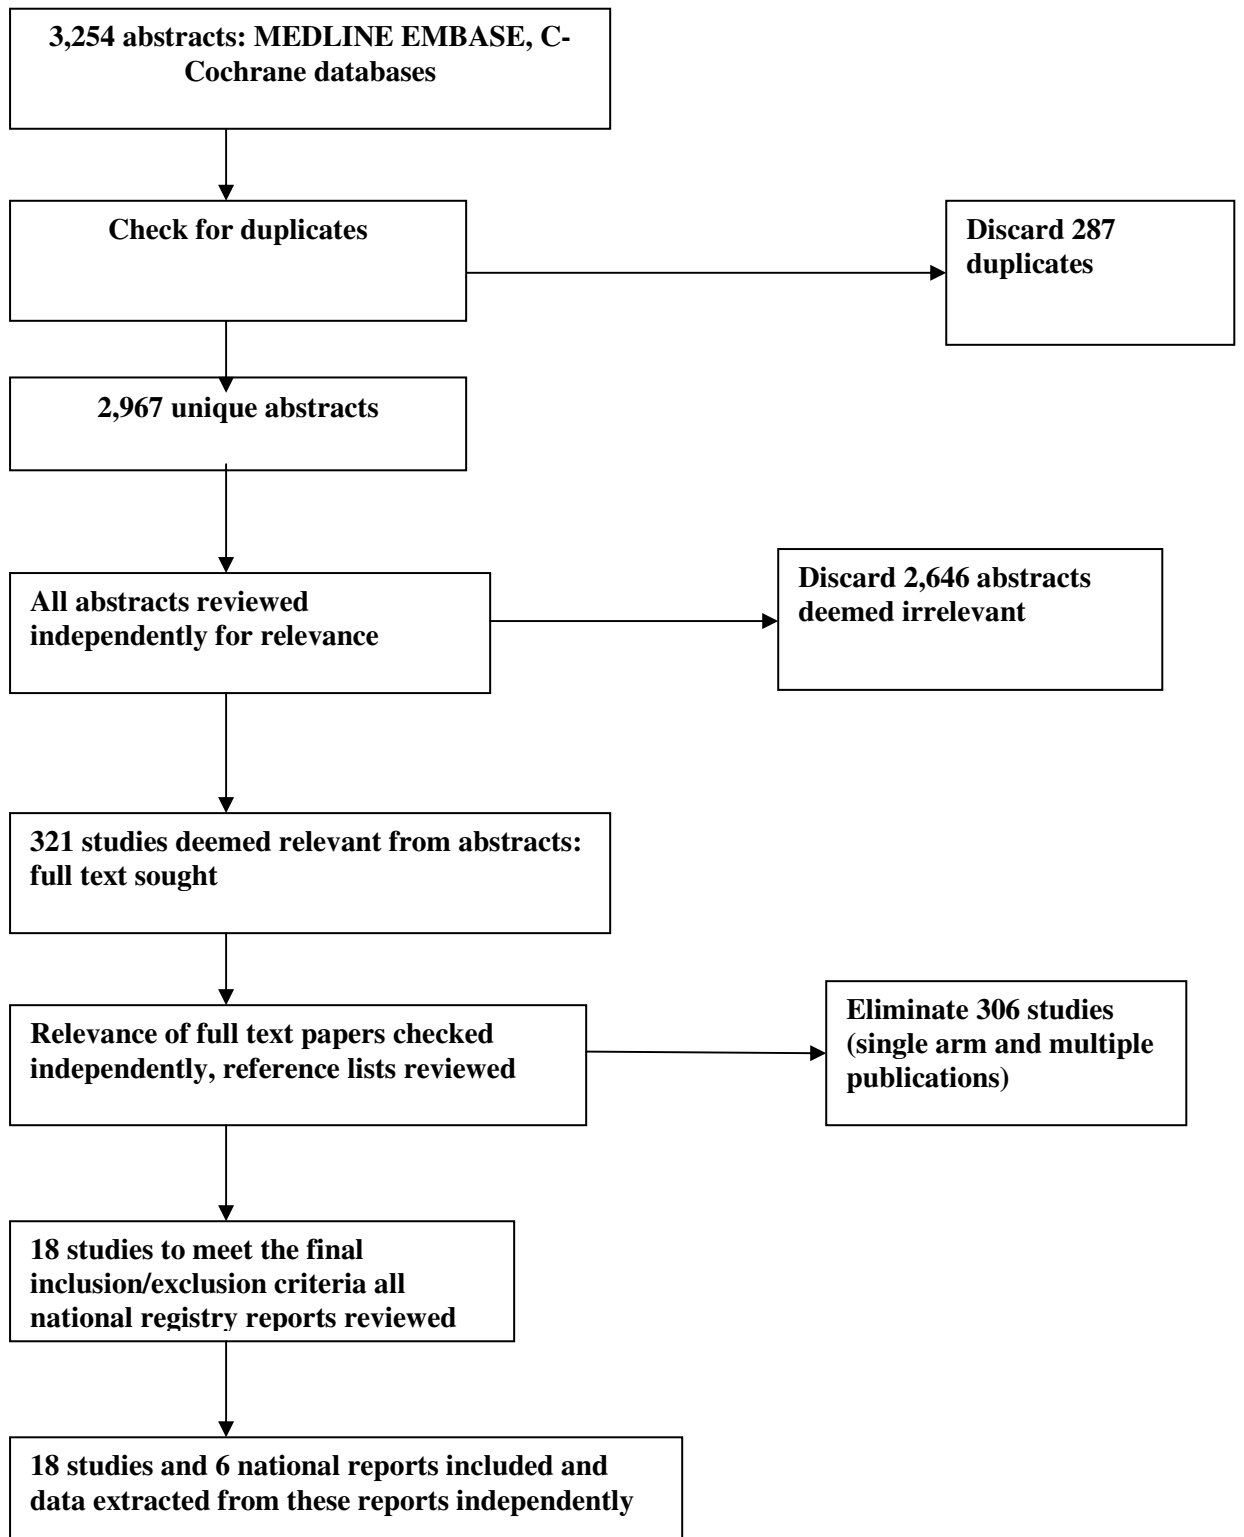

Supplement: seda890186.ww3_default.pdf [file seda890186.ww3_default.pdf]
